# Supplementary material
Source: PubMed Central journal article supplement (PMC8264758)

## Supplementary Online Content

Huang C-H, Fu Y, Chi C-C. Health-related quality of life, depression, and self-esteem in patients with androgenetic alopecia: a systematic review and meta-analysis. *JAMA Dermatol*. Published online July 7, 2021. doi:10.1001/jamadermatol.2021.2196

**eTable 1.** Search Strategy

**eTable 2.** Summary of Included Studies

**eTable 3.** Factors Associated With Health-Related Quality of Life in Androgenetic Alopecia

**eFigure 1.** Dermatology Life Quality Index Score in Androgenetic Alopecia Patients of Different Sexes

**eFigure 2.** Dermatology Life Quality Index Score in Androgenetic Alopecia Patients in Asia and Europe

This supplementary material has been provided by the authors to give readers additional information about their work.

**eTable 1. Search Strategy**

|    |                                                                                                                                                                                                                                                                                                                                                                                                                                                                                                                                                                                                                                                                                                                                                                                                                                                                                                                                                                                                                                                                                                                                                                                                                                                                                                                                                                                                                                                                                                                                                            |
|----|------------------------------------------------------------------------------------------------------------------------------------------------------------------------------------------------------------------------------------------------------------------------------------------------------------------------------------------------------------------------------------------------------------------------------------------------------------------------------------------------------------------------------------------------------------------------------------------------------------------------------------------------------------------------------------------------------------------------------------------------------------------------------------------------------------------------------------------------------------------------------------------------------------------------------------------------------------------------------------------------------------------------------------------------------------------------------------------------------------------------------------------------------------------------------------------------------------------------------------------------------------------------------------------------------------------------------------------------------------------------------------------------------------------------------------------------------------------------------------------------------------------------------------------------------------|
| #1 | androgenetic alopecia OR androgenic alopecia OR pattern hair loss OR pattern alopecia OR baldness                                                                                                                                                                                                                                                                                                                                                                                                                                                                                                                                                                                                                                                                                                                                                                                                                                                                                                                                                                                                                                                                                                                                                                                                                                                                                                                                                                                                                                                          |
| #2 | health status OR health stat* OR quality of life OR quality of life OR patient preference OR preference* OR utilit* OR questionnaire OR health survey OR self report OR well being OR wellbeing OR Quality-Adjusted Life Year OR QALY* OR Quality adjusted life year* OR Quality-adjusted life year* OR life quality OR QOL OR HRQL OR HRQOL                                                                                                                                                                                                                                                                                                                                                                                                                                                                                                                                                                                                                                                                                                                                                                                                                                                                                                                                                                                                                                                                                                                                                                                                               |
| #3 | Mental disorders OR serious mental illness OR mental health OR mental illness OR mental disorder OR mental disease OR mental problem OR depression OR bipolar Disorder OR Addiction OR adjustment disorder OR anxiety OR anxiety disorder OR behavior disorder OR emotional disorder OR mood disorder OR neurosis OR personality disorder OR psychosexual disorder OR psychosis OR psychosomatic disorder OR psychotrauma disorder OR PTSD OR schizophrenia spectrum disorder OR schizoaffective                                                                                                                                                                                                                                                                                                                                                                                                                                                                                                                                                                                                                                                                                                                                                                                                                                                                                                                                                                                                                                                           |
| #4 | EuroQol OR EQ5D OR EQ-5D OR SF-8 OR SF 8 OR SF8 OR short form 8 OR shortform-8 OR short-form-8 OR shortform 8 OR SF-36 OR SF36 OR SF 36 OR short form 36 OR shortform 36 OR shortform-36 OR short-form-36 OR RAND 36 OR RAND-36 OR RAND36 OR SF-12 OR SF12 OR SF 12 OR short form 12 OR shortform 12 OR shortform-12 OR short-form-12 OR short-form-12 OR Medical Outcomes Survey OR MOS OR WHOQOL-100 OR WHOQOL 100 OR World Health Organization Quality of Life assessment OR WHOQOL-BREF OR WHOQOL BREF OR Assessment of Quality of Life OR AqoL OR DLQI OR Dermatology Life Quality Index OR Skindex OR Scalpdx OR hairdex OR Kingsley Alopecia Profile OR KAP OR State-Trait Anxiety Inventory OR STAI OR the Big Five Questionnaire OR BFQ OR Trait Emotional Intelligence Questionnaire OR TEI-Que-SF OR StateTrait Anxiety Inventory OR STAI OR Social Phobia Scale OR SPS OR Social Interaction Anxiety Scale OR SIAS OR Self-Perception Scale OR SPS OR Rosenberg Self-Esteem Scale OR RSES OR Beck Depression Inventory OR BDI OR Beck Anxiety Inventory OR BAI OR Brief Illness Perception Questionnaire OR BIPQ OR Self-rating Depression Scale OR SDS OR Self-rating Anxiety Scale OR SAS OR General Health Questionnaire OR GHQ-12 OR Coping Orientations to Problems Experienced OR COPE OR Toronto Alexithymia Scale-20 OR TAS-20 OR Hospital Anxiety and Depression Scale OR HADS OR UCLA Loneliness Scale OR UCLA-LS OR symptom checklist 90 revised OR SCL90R OR skindex OR Turkish quality of life instrument for skin disease OR TQL |
| #5 | Anxiety assessment OR Anxiety Sensitivity index OR Beck Anxiety inventory OR Death Anxiety Scale OR Depression Anxiety Stress Scale OR Hamilton Anxiety Scale OR Hospital Anxiety and Depression Scale OR Liebowitz Social Anxiety Scale OR manifest anxiety Scale OR psychological distress assessment OR self-rating anxiety scale OR Social interaction Anxiety scale OR Social Phobia scale OR State Trait Anxiety inventory OR Yale Brown Obsessive Compulsive Scale OR Behavior disorder assessment OR Addiction severity scale OR Alcohol Use Disorder Identification Test OR eating disorder assessment OR Yale Brown Cornell Eating Disorder Scale OR Dissociative experiences scale OR general mental disease assessment OR Brief Psychiatric Rating scale OR Clinical Global Impression scale OR comprehensive psychopathological rating scale OR Diagnostic Interview Schedule OR Global Assessment of Functioning OR Katz Adjustment Scales OR MacArthur Competence Assessment OR Millon Clinical Multiaxial Inventory OR mini international neuropsychiatric interview OR Pain Catastrophizing scale OR patient health questionnaire OR Psychiatric Symptom Index OR Psychosocial Adjustment to Illness Scale OR Structured Clinical Interview for DSM Disorders OR Symptom Checklist 90 OR mood disorder assessment OR depression                                                                                                                                                                                                           |

|    |                                                                                                                                                                                                                                                                                                                                                                                                                                                                                        |
|----|----------------------------------------------------------------------------------------------------------------------------------------------------------------------------------------------------------------------------------------------------------------------------------------------------------------------------------------------------------------------------------------------------------------------------------------------------------------------------------------|
|    | assessment OR mania assessment OR Mood Disorder Questionnaire OR Profile of Mood states OR neuropsychiatric inventory OR personality disorder assessment OR Hare Psychopathy Checklist OR Personality disorder Questionnaire OR Psychotrauma assessment OR Childhood Trauma Questionnaire OR Impact of Events Scale OR Schizophrenia assessment OR Positive and Negative Affect Schedule OR Positive and Negative Syndrome Scale OR Schedule for Affective Disorders and Schizophrenia |
| #6 | #2[title/abstract] or #4[text word]                                                                                                                                                                                                                                                                                                                                                                                                                                                    |
| #7 | #3[title/abstract] or #5[text word]                                                                                                                                                                                                                                                                                                                                                                                                                                                    |
| #8 | #1[title/abstract] AND (#6 or #7)                                                                                                                                                                                                                                                                                                                                                                                                                                                      |

**eTable 2.** Summary of Included Studies

| <b>Author, year, country</b>             | <b>Study period</b> | <b>Study type</b>         | <b>Patient characteristics</b>                                                                 | <b>Mean age, disease duration</b>                                  | <b>HRQOL or Psychological instrument</b> | <b>Mean HRQOL score or Psychiatric result</b>                                                                      |
|------------------------------------------|---------------------|---------------------------|------------------------------------------------------------------------------------------------|--------------------------------------------------------------------|------------------------------------------|--------------------------------------------------------------------------------------------------------------------|
| Kutlu, 2021, <sup>28</sup><br>Turkey     | Not reported        | Case series               | 21 women; Sinclair II/III/IV/V:<br>2/8/9/2                                                     | 32.05 years;<br>disease duration:<br>5.5 years                     | DLQI                                     | 11 (median)                                                                                                        |
| Elsaie, 2020, <sup>55</sup><br>Egypt     | Not reported        | Cross-sectional survey    | 400 men; No severity record                                                                    | No age record;<br>Duration: <1 year/1-5 year/>5year:<br>58/114/148 | WHOQOL-BREF                              | Total: 52.4 ± 12.7;<br>Physical: 15.5 ± 3.8; Psychological: 13.3 ± 3.7; Social: 7.7 ± 2.8; Environment: 15.9 ± 5.3 |
| Katoulis, 2020, <sup>43</sup><br>Greece  | Jun. 2018-May 2019  | Randomized clinical trial | 41 (M/F 18/23); No severity record                                                             | (Study/Control)<br>Median age: 44/43;<br>Median duration: 9.5/5    | DLQI                                     | (Study/Control) 4/4                                                                                                |
| Ramos, 2020, <sup>45</sup><br>Brazil     | 24 weeks            | Randomized clinical trial | 52 women (Control/Study: 26/26); Severity: Sinclair II/III/IV: Control: 15/10/1; Study: 17/8/1 | 43.95 years; no duration record                                    | WAA-QOL                                  | 68/60                                                                                                              |
| Vastarella, 2020, <sup>32</sup><br>Italy | Jul. 2019-Jul. 2020 | Case series               | 12 women                                                                                       | 36.66 years,                                                       | WAA-QOL                                  | 70.33 (median)                                                                                                     |

| Author, year, country                  | Study period                | Study type             | Patient characteristics                                                                                               | Mean age, disease duration            | HRQOL or Psychological instrument | Mean HRQOL score or Psychiatric result                                                                       |
|----------------------------------------|-----------------------------|------------------------|-----------------------------------------------------------------------------------------------------------------------|---------------------------------------|-----------------------------------|--------------------------------------------------------------------------------------------------------------|
| Chyi, 2019, <sup>48</sup> Malaysia     | Jan. 2016 – June 2016       | Cross-sectional survey | 125 (M/F 84/41); Severity: Norwood Gr. I/II/IIA/III/IIIv/IIIA/IV/IVA/V: 17/14/28/9/10/2/2/1/1; Ludwig 1/2/3: 41/0/0   | Age >21 years; no duration record     | DLQI                              | 3.94 ± 0.37                                                                                                  |
| Guerra-Tapia 2019, <sup>46</sup> Spain | Jan. 2018 – Oct. 2018       | Cross-sectional survey | 983 women<br>Severity: Sinclair alopecia scale Gr. I/II/III/IV/V/unknown: 231/364/263/66/3/56                         | 50 years; no duration record          | HSS-29                            | Total: 27.59 ± 18.71,<br>Function: 19.31 ± 20.97;<br>Emotion: 37.77 ± 23.06;<br>Symptom: 27.28 ± 18.85       |
|                                        |                             |                        |                                                                                                                       |                                       | SF-12                             | PCS: 46.24 ± 6.38; MCS: 42.08 ± 8.18                                                                         |
| Gupta, 2019, <sup>38</sup> India       | Not reported                | Cross-sectional survey | 200 men; Severity: Hamilton-Norwood Gr. I/II/IIA/III/IIIA/IIIV/IV/IVA/V/VA/VI/VII: 13/22/22/21/20/19/24/17/13/15/10/4 | 32 years; disease duration: 5.8 years | DLQI                              | Total: 13.52 ± 3.15                                                                                          |
|                                        |                             |                        |                                                                                                                       |                                       | HSS-29                            | Functioning: 25.89 ± 4.814;<br>Symptoms: 22.01 ± 5.025;<br>Emotions: 27.73 ± 5.942;<br>Global: 75.62 ± 13.78 |
| Liu, 2019, <sup>16</sup> China         | Jan. 1, 2014 – June 1, 2017 | Cross-sectional survey | 875 men; Hamilton Gr. I/II/III/IV/V: 70/274/335/123/73                                                                | 30.85 years; no duration record       | RSES                              | 29.79 ± 5.750                                                                                                |

| Author, year, country                   | Study period             | Study type             | Patient characteristics                                                              | Mean age, disease duration      | HRQOL or Psychological instrument | Mean HRQOL score or Psychiatric result                                                                                                                                                                                      |
|-----------------------------------------|--------------------------|------------------------|--------------------------------------------------------------------------------------|---------------------------------|-----------------------------------|-----------------------------------------------------------------------------------------------------------------------------------------------------------------------------------------------------------------------------|
| Russo, 2019, <sup>29</sup><br>Italy     | Sep. 2016 -<br>Sep. 2017 | Cross-sectional survey | 80 (M/F 23/57)<br>Severity: Hamilton-Norwood<br>Gr. I-III: 21/43; Gr. IIIA-IVA: 2/13 | 38.77 years; no duration record | DLQI                              | 2.47 ± 2.9 / 7.32 ± 5.82                                                                                                                                                                                                    |
|                                         |                          |                        |                                                                                      |                                 | BFQ                               | Energy/extraversion: 3.08 ± 0.35/3.01 ± 0.39;<br>Conscientiousness: 3.58 ± 0.54/3.43 ± 0.56;<br>Emotion stability: 3.07 ± 0.63/2.64 ± 0.63;<br>Agreeableness: 3.35 ± 0.42/3.29 ± 0.47;<br>Openness: 3.57 ± 0.49/3.44 ± 0.54 |
|                                         |                          |                        |                                                                                      |                                 | TEI-Que-SF                        | 145.9 ± 15.6/131.5 ± 18.1                                                                                                                                                                                                   |
|                                         |                          |                        |                                                                                      |                                 | STAI                              | 42.8 ± 5.97/49.4 ± 9.94                                                                                                                                                                                                     |
|                                         |                          |                        |                                                                                      |                                 | SPI                               | 18.0 ± 6.14/25.4 ± 9.91                                                                                                                                                                                                     |
|                                         |                          |                        |                                                                                      |                                 | SIAS                              | 15.2 ± 4.07/21.5 ± 9.19                                                                                                                                                                                                     |
| Danyal, 2018, <sup>41</sup><br>Pakistan | Not reported             | Cross-sectional survey | 60 men (mild to moderate hair loss / severe hair loss: 30/30)                        | 23.14 years; no duration record | HAM-A                             | 20.23 ± 1.40/15.46 ± 1.08                                                                                                                                                                                                   |
|                                         |                          |                        |                                                                                      |                                 | RSES                              | 16.46 ± 1.07/17.3 ± 1.0                                                                                                                                                                                                     |
|                                         |                          |                        |                                                                                      |                                 | SDS                               | 38.3 ± 1.16/35.3 ± 0.8                                                                                                                                                                                                      |
| Ghimire, 2018, <sup>47</sup><br>Nepal   | July 2017 – Feb. 2018    | Cross-sectional survey | 120 men                                                                              | 31.87 years; no duration record | DLQI                              | Total 2.79                                                                                                                                                                                                                  |

| Author, year, country                   | Study period           | Study type                | Patient characteristics                                                                                           | Mean age, disease duration                | HRQOL or Psychological instrument | Mean HRQOL score or Psychiatric result                                                                                                                   |
|-----------------------------------------|------------------------|---------------------------|-------------------------------------------------------------------------------------------------------------------|-------------------------------------------|-----------------------------------|----------------------------------------------------------------------------------------------------------------------------------------------------------|
| Gonul, 2018, <sup>24</sup><br>Turkey    | Not reported           | Cross-sectional survey    | 82 (M/F, 30/52), severity: Ludwig I/II/III: 2/38/12; Hamilton I/II/IIa/III/IIIa/III vertex/Va/VI: 6/9/1/5/3/4/1/1 | 30.13 years; Disease duration: 3.14 years | Total Hairdex                     | Total: 68.43 ± 31.58; Emotions: 34.45 ± 20.21; Functions: 5.71 ± 4.07; Symptoms: 8.85 ± 6.64; Self-confidence: 13.82 ± 6.81; Stigmatization: 5.60 ± 6.13 |
|                                         |                        |                           |                                                                                                                   |                                           | TQL                               | 14.69 ± 10.15                                                                                                                                            |
| Jun, 2018, <sup>39</sup><br>Korea       | Mar. 2012 – Feb., 2017 | Cross-sectional survey    | 380                                                                                                               | No mean age and disease duration record   | HSS-29                            | Functioning: 26.9<br>Symptoms: 29.3<br>Emotions: 43.8<br>Global: 34.3                                                                                    |
| Katoulis, 2018, <sup>44</sup><br>Greece | Not reported           | Randomized clinical trial | 39 women; severity: Olsen pattern: 6, Ludwig I/II/III: 15/13/5                                                    | 52 years; Duration: 9 years               | DLQI                              | Total 4                                                                                                                                                  |
| Lin, 2018, <sup>15</sup><br>China       | Sep. 2015 – Oct. 2017  | Cross-sectional survey    | 159                                                                                                               | No mean age and duration record           | DLQI                              | Total: 8.77 ± 5.23                                                                                                                                       |
|                                         |                        |                           |                                                                                                                   |                                           | CES-D                             | 14.87 ± 9.81                                                                                                                                             |

| Author, year, country              | Study period          | Study type             | Patient characteristics                                                                                                   | Mean age, disease duration                            | HRQOL or Psychological instrument | Mean HRQOL score or Psychiatric result                                                                                                                                                                                                                                                |
|------------------------------------|-----------------------|------------------------|---------------------------------------------------------------------------------------------------------------------------|-------------------------------------------------------|-----------------------------------|---------------------------------------------------------------------------------------------------------------------------------------------------------------------------------------------------------------------------------------------------------------------------------------|
| Tas, 2018, <sup>25</sup><br>Turkey | Oct. 2013 – May 2014  | Cross-sectional survey | 353(M/F: 283/70);<br>Hamilton-Norwood<br>II/IIA/III/IIIA/IIIV/IV/IVA:<br>44/96/61/31/21/19/11<br>Ludwig I/II/III: 6/45/19 | 24.87<br>years;<br>Disease<br>duration 1-<br>3 years  | SPS                               | 134.92 ± 26.81/104.4 ± 17.98                                                                                                                                                                                                                                                          |
|                                    |                       |                        |                                                                                                                           |                                                       | RSES                              | 15.76 ± 5.33/11.57 ± 2.88                                                                                                                                                                                                                                                             |
|                                    |                       |                        |                                                                                                                           |                                                       | ASEX                              | 17.52 ± 4.41/22.24 ± 3.3                                                                                                                                                                                                                                                              |
|                                    |                       |                        |                                                                                                                           |                                                       | BDI                               | 8.82 ± 5.07/14.74 ± 4.44                                                                                                                                                                                                                                                              |
|                                    |                       |                        |                                                                                                                           |                                                       | BAI                               | 5.95 ± 3.83/11.93 ± 4.85                                                                                                                                                                                                                                                              |
| Wang, 2018, <sup>17</sup><br>China | Not reported          | Cross-sectional survey | 355 college students<br>(M/F 340/15)                                                                                      | Age range<br>17-40<br>years; no<br>duration<br>record | SCL-90-R                          | Somatization: 1.78 ± 0.53; Obsessive-compulsive: 1.74 ± 0.51; Interpersonal sensitivity: 1.53 ± 0.51; Depression: 1.57 ± 0.50; Anxiety: 1.49 ± 0.49; Hostility: 1.49 ± 0.56; Phobic anxiety: 1.43 ± 0.36; Paranoid ideation: 1.44 ± 0.45; Psychoticism: 1.48 ± 0.44; GSI: 1.50 ± 0.46 |
| Mao, 2017, <sup>18</sup><br>China  | Feb. 2016 – Jun. 2016 | Cross-sectional survey | 161 (M/F 117/44)                                                                                                          | No mean age and duration record                       | DLQI                              | Total: 8.97 ± 5.24                                                                                                                                                                                                                                                                    |
|                                    |                       |                        |                                                                                                                           |                                                       | CES-D                             | 14.89 ± 9.82                                                                                                                                                                                                                                                                          |



| <b>Author, year, country</b>                 | <b>Study period</b>          | <b>Study type</b>      | <b>Patient characteristics</b>                       | <b>Mean age, disease duration</b>      | <b>HRQOL or Psychological instrument</b> | <b>Mean HRQOL score or Psychiatric result</b>                                                              |
|----------------------------------------------|------------------------------|------------------------|------------------------------------------------------|----------------------------------------|------------------------------------------|------------------------------------------------------------------------------------------------------------|
| Sanclemente, 2017, <sup>49</sup><br>Colombia | Not reported                 | Cross-sectional survey | 47                                                   | No mean age and duration record        | HSS-29                                   | Functioning: 12.5 ± 16.5; Symptoms: 18.8 ± 18.1; Emotions: 30.8 ± 23; Global: 20.3 ± 15.2                  |
| Zhang, 2017, <sup>19</sup><br>China          | Jan. 1, 2013 – Dec. 31, 2015 | Cross-sectional survey | 123                                                  | No mean age and duration record        | DLQI                                     | 5.51 ± 5.03                                                                                                |
| Sancak, 2016, <sup>26</sup><br>Turkey        | Dec. 2013 – June 2015        | Case-control, study    | 115 premenopausal women                              | 36.28 years; no duration record        | FSFI                                     | Total: 25.43 ± 6.88                                                                                        |
| Shilpashree, 2016, <sup>36</sup><br>India    | Jan. 2013 – Dec. 2013        | Cross-sectional survey | 100 women; Sinclair scale Gr. II/III/IV/V: 79/11/9/1 | 29.9 years; disease duration 2.5 years | mWAA-QOL                                 | 36.10 ± 6.91; Sinclair scale: Gr. II: 35.89 ± 3.33; Gr. III: 36.01 ± 7.89; Gr. IV: 36.82 ± 7.55; Gr. V: 37 |

| Author, year, country                  | Study period          | Study type             | Patient characteristics                                   | Mean age, disease duration               | HRQOL or Psychological instrument | Mean HRQOL score or Psychiatric result                                                                                                                                                                                                |
|----------------------------------------|-----------------------|------------------------|-----------------------------------------------------------|------------------------------------------|-----------------------------------|---------------------------------------------------------------------------------------------------------------------------------------------------------------------------------------------------------------------------------------|
| Yu, 2016, <sup>20</sup><br>China       | Oct. 2013 – Dec. 2014 | Cross-sectional survey | 212 (M/F: 133/79)                                         | 30.34 years; disease duration 4.46 years | BIPQ                              | Total score: 43.76 ± 8.86; Consequences: 5.65 ± 2.69; Timeline: 6.16 ± 2.68; Personal control: 5.18 ± 2.34; Treatment control: 4.11 ± 2.02; Identity: 4.14 ± 2.33; Concern: 7.96 ± 2.26; Coherence: 4.82 ± 2.58; Emotion: 5.75 ± 2.83 |
|                                        |                       |                        |                                                           |                                          | SDS                               | 44.43 ± 9.28 (SDS > 53: n = 36)                                                                                                                                                                                                       |
|                                        |                       |                        |                                                           |                                          | SAS                               | 40.44 ± 9.21 (SAS > 50: n = 40)                                                                                                                                                                                                       |
|                                        |                       |                        |                                                           |                                          | DLQI                              | Total DLQI: 8.30 ± 5.04; Symptoms and feelings: 2.26 ± 1.48; Daily activities: 1.95 ± 1.74; Leisure: 1.07 ± 1.56; Work and school: 1.84 ± 0.83; Personal relationships: 0.61 ± 0.98; Treatment: 0.57 ± 0.57                           |
| Lan, 2015, <sup>21</sup><br>China      | Oct. 2012 – Oct. 2013 | Cross-sectional survey | 165 men                                                   | 29.7 years; disease duration 5.2 years   | DLQI                              | Total: 5.50 ± 4.44                                                                                                                                                                                                                    |
|                                        |                       |                        |                                                           |                                          | VAS                               | 31.39 ± 21.08%                                                                                                                                                                                                                        |
| Tahir, 2013, <sup>42</sup><br>Pakistan | Apr. 2010 – Sep. 2010 | Cross-sectional survey | 125 (M/F 53/72); Severity: mild/moderate/severe: 50/45/30 | 29.01 years; no duration record          | DLQI                              | 12.8 ± 3.76                                                                                                                                                                                                                           |

| Author, year, country                    | Study period         | Study type         | Patient characteristics                                                                       | Mean age, disease duration      | HRQOL or Psychological instrument | Mean HRQOL score or Psychiatric result                                                                                                                                                                                                                                                                                                                                                                                                                                           |
|------------------------------------------|----------------------|--------------------|-----------------------------------------------------------------------------------------------|---------------------------------|-----------------------------------|----------------------------------------------------------------------------------------------------------------------------------------------------------------------------------------------------------------------------------------------------------------------------------------------------------------------------------------------------------------------------------------------------------------------------------------------------------------------------------|
| Monselise, 2013, <sup>50</sup><br>Canada | Not reported         | Case-control study | 35 (M/F 9/26);                                                                                | 38.4 years; no duration record  | EQ-i                              | Total: 95.1 ± 16.5; Self-Regard: 96.8 ± 15.9; Emotional Self-Awareness 99.9 ± 15.1; Assertiveness: 98.3 ± 17.2; Independence: 99.1 ± 16.9; Self-Actualization: 94.4 ± 16.4; Empathy: 95.3 ± 14.6; Social Responsibility: 97.0 ± 12.4; Interpersonal Relationship: 95.6 ± 15.6; Stress Tolerance: 96.0 ± 15.7; Impulse Control: 99.6 ± 14.2; Reality Testing: 94.9 ± 17.3; Flexibility: 100.1 ± 16.1; Problem Solving: 95.2 ± 15.1; Optimism: 95.9 ± 17.0; Happiness: 95.3 ± 16.8 |
| Tabolli, 2013, <sup>30</sup><br>Italy    | Oct. 2009 – May 2011 | Case-control study | 351 (M/F 237/114); Hamilton-Norwood: mild/moderate/severe: 136/94/7; Ludwig: Gr. I/II: 104/10 | 35.63 years; no duration record | SF-12                             | PCS: 53.3 ± 6.9; MCS: 43.1 ± 11.1                                                                                                                                                                                                                                                                                                                                                                                                                                                |
|                                          |                      |                    |                                                                                               |                                 | TAS-20                            | Total: 42.9 ± 12; DIF: 13.7 ± 6.2; DDF: 11.4 ± 4.5; EOT: 17.8 ± 4.8                                                                                                                                                                                                                                                                                                                                                                                                              |
|                                          |                      |                    |                                                                                               |                                 | COPE                              | PFC: 11.3 ± 1.8; AEC: 9.8 ± 1.7; AC: 6.7 ± 1.4                                                                                                                                                                                                                                                                                                                                                                                                                                   |
|                                          |                      |                    |                                                                                               |                                 | GHQ-12                            | 13.4 ± 6                                                                                                                                                                                                                                                                                                                                                                                                                                                                         |

| Author, year, country                  | Study period          | Study type             | Patient characteristics                                                                               | Mean age, disease duration               | HRQOL or Psychological instrument | Mean HRQOL score or Psychiatric result                                                          |
|----------------------------------------|-----------------------|------------------------|-------------------------------------------------------------------------------------------------------|------------------------------------------|-----------------------------------|-------------------------------------------------------------------------------------------------|
| Zhuang, 2013, <sup>22</sup><br>China   | Feb. 2011 – June 2011 | Cross-sectional survey | 125 women; Ludwig score: Gr. I/II/III: 57/46/22                                                       | 32.21 years; disease duration 2.65 years | DLQI                              | 9.62 ± 5.92                                                                                     |
|                                        |                       |                        |                                                                                                       |                                          | VAS                               | 57.78 ± 18.06                                                                                   |
| Han, 2012, <sup>40</sup><br>Korea      | Mar. 2009 – Apr. 2009 | Cross-sectional survey | 998 men; BSAP classification: mild (M1, M2, C1, V1, F1)/ severe (M3, C2-3, U1-3, V2-3, F2-3): 600/398 | 41.7 years; Mean duration: 6.23 years    | HSS-29                            | Function: 24.0 ± 20.1; Symptom: 26.3 ± 19.5; Emotions: 32.1 ± 21.8; Global: 27.3 ± 19.1         |
| Reid, 2012, <sup>33</sup><br>USA       | Mar. 2009 – Nov. 2009 | Cross-sectional survey | 41 women;                                                                                             | No mean age and mean duration record     | Skindex-16                        | Function: 56.74 ± 31.38; Symptoms: 14.93 ± 18.18; Emotions: 84.64 ± 14.66; Global: 58.50 ± 16.9 |
| Yayli, 2012, <sup>27</sup><br>Turkey   | Not reported          | Case-control study     | 46 (M/F 22/24)                                                                                        | 28.2 years; no duration record           | BAI                               | 13.30 ± 13.05                                                                                   |
|                                        |                       |                        |                                                                                                       |                                          | BDI                               | 11.35 ± 11.86                                                                                   |
|                                        |                       |                        |                                                                                                       |                                          | HSS-29                            | Function: 8.31 ± 13.05<br>Symptoms: 11.72 ± 14.61<br>Emotions: 15.93 ± 17.41                    |
| Yamazaki, 2011, <sup>51</sup><br>Japan | Aug. 2007 – Dec. 2009 | Cross-sectional survey | 27 men                                                                                                | 33.8 years; no duration record           | VAS                               | 21.4 ± 13.7                                                                                     |
|                                        |                       |                        |                                                                                                       |                                          | DLQI                              | Total: 5.74 ± 6.14                                                                              |
|                                        |                       |                        |                                                                                                       |                                          | WHO/QOL-26                        | Average: 3.36 ± 0.46                                                                            |
|                                        |                       |                        |                                                                                                       |                                          | STAI                              | Trait Anxiety: 45.5 ± 11.2                                                                      |

| Author, year, country                | Study period | Study type             | Patient characteristics                         | Mean age, disease duration                                               | HRQOL or Psychological instrument | Mean HRQOL score or Psychiatric result                                                                                                                                                                                                                                                                                                                                                                           |
|--------------------------------------|--------------|------------------------|-------------------------------------------------|--------------------------------------------------------------------------|-----------------------------------|------------------------------------------------------------------------------------------------------------------------------------------------------------------------------------------------------------------------------------------------------------------------------------------------------------------------------------------------------------------------------------------------------------------|
| Sawant, 2010, <sup>37</sup><br>India | Not reported | Cross-sectional survey | 37 men; all between Hamilton-Norwood IIa to VII | No mean age (age 15-25 /26-50 years: 23/14 patients), no duration record | Lifestyle indices                 | Eating habits: 13.69 ± 3.95 / 11.92 ± 3.43; Physical: 4.91 ± 1.70 / 4.64 ± 2.30; Occupational 10.43 ± 3.51 / 9.57 ± 4.05; Leisure: 4.78 ± 2.71 / 4.28 ± 2.89; Psychological and addictions: 2.0 ± 3.13 / 1.7 ± 3.8                                                                                                                                                                                               |
|                                      |              |                        |                                                 |                                                                          | Hairdex                           | Emotions: 25.26 ± 13.14 / 20.92 ± 16.21; Functioning: 9.6 ± 10.91 / 11.85 ± 7.55; Symptoms: 6.91 ± 4.89 / 9.28 ± 6.71; Self-assurance: 10.52 ± 5.05 / 14.28 ± 7.32; Stigmatization: 13.17 ± 9.55 / 13.9 ± 12.2                                                                                                                                                                                                   |
|                                      |              |                        |                                                 |                                                                          | SCL-90                            | Somatization: 3.17 ± 5.11 / 3.57 ± 4.23; Obsessive-compulsive: 7.39 ± 7.14 / 9.21 ± 10.94; Interpersonal sensitivity: 4.174 ± 6.08 / 4.21 ± 3.18; Depression: 4.913 ± 8.37 / 5.57 ± 9.37; Anxiety: 1.43 ± 2.39 / 1.9 ± 7.21; Anger and hostility: 2.913 ± 4.814 / 2.78 ± 4.42; Phobic anxiety: 0.39 ± 1.07 / 0.92 ± 2.55; Paranoid ideation: 2.13 ± 4.49 / 1.92 ± 3.24; Psychoticism: 0.565 ± 1.12 / 0.92 ± 3.47 |
|                                      |              |                        |                                                 |                                                                          | SLES                              | Familial: 0.434 ± 0.727 / 0.928 ± 1.207; Involving finances and achievements: 1.260 ± 1.657 / 1.357 ± 1.737; Personal stressors: 0.478 ± 0.845 / 0.714 ± 1.139; Social stressors: 0.173 ± 0.491 / 0.142 ± 0.363; Total: 2.347 ± 2.963 / 3.142 ± 3.416                                                                                                                                                            |

| Author, year, country                    | Study period          | Study type             | Patient characteristics                                                                                                        | Mean age, disease duration            | HRQOL or Psychological instrument | Mean HRQOL score or Psychiatric result                                                                                                                                                     |
|------------------------------------------|-----------------------|------------------------|--------------------------------------------------------------------------------------------------------------------------------|---------------------------------------|-----------------------------------|--------------------------------------------------------------------------------------------------------------------------------------------------------------------------------------------|
| Biondo, 2010, <sup>54</sup><br>Australia | Not reported          | Cross-sectional survey | 130 women; No severity record                                                                                                  | 45.14 years; no duration record       | WAA-QOL                           | 2.96 ± 0.14                                                                                                                                                                                |
| Hu, 2009, <sup>23</sup><br>China         | Jun. 2005 – Jun. 2007 | Cross-sectional survey | 320 (M/F 250/70); Norwood-Hamilton: I/I+/II-/II+/III-/III/III+/IV-IV/IV+/V/VI/VII<br>19/36/19/34/16/28/42/10/11/28/25/28/12/12 | 30 years; disease duration 4.48 years | DLQI                              | Total Score: 9.19 ± 5.66                                                                                                                                                                   |
|                                          |                       |                        |                                                                                                                                |                                       | CES-D                             | 15.06 ± 8.40                                                                                                                                                                               |
| Hirsso, 2005, <sup>52</sup><br>Finland   | 1996 - 1998           | Cohort study           | 105 women in aged 63 years                                                                                                     | 63 years; no duration record          | RAND-36                           | Physical functioning: 71.2 ± 20.7; Energy/fatigue: 69.0 ± 19.3; Emotional well-being: 78.9 ± 15.5; Social functioning: 85.7 ± 19.3; Pain: 68.6 ± 24.7; General health: 55.9 ± 17.3         |
|                                          |                       |                        |                                                                                                                                |                                       | BDI                               | 22% ≥ 10                                                                                                                                                                                   |
| Schmidt, 2001, <sup>53</sup><br>Germany  | Not reported          | Cross-sectional survey | 20 Women; Ludwig scale I/II/III: 3/12/5                                                                                        | no mean age and duration record       | Hairdex                           | (Ludwig scale I/II/III)<br>Emotions: 33.19/37.49/41.11; Functions: 19.22/24.98/26.33; Symptoms: 21.89/20.92/29.71; Self-confidence: 35.89/29.83/31.44<br>Stigmatization: 20.08/21.48/26.89 |

| Author, year, country                | Study period          | Study type             | Patient characteristics                                                                                     | Mean age, disease duration      | HRQOL or Psychological instrument | Mean HRQOL score or Psychiatric result                                                                                                                                                                                                                                                                                                                                                                       |
|--------------------------------------|-----------------------|------------------------|-------------------------------------------------------------------------------------------------------------|---------------------------------|-----------------------------------|--------------------------------------------------------------------------------------------------------------------------------------------------------------------------------------------------------------------------------------------------------------------------------------------------------------------------------------------------------------------------------------------------------------|
| Maffei, 1994, <sup>31</sup><br>Italy | Jan. 1992 – Jun. 1992 | Cross-sectional survey | 116 (M/F 64/52)                                                                                             | 30.9 years; no duration record  | SCL-90                            | Somatization: 3.24 ± 3.48 / 6.56 ± 6.79; Obsessive-compulsive: 5.16 ± 4.87 / 8.27 ± 6.79; Interpersonal sensitivity: 3.59 ± 3.44 / 5.82 ± 6.04; Depression: 4.95 ± 5.41 / 11.71 ± 9.45; Anxiety: 4.18 ± 3.82 / 7.52 ± 6.15; Anger and hostility: 2.77 ± 2.89 / 3.85 ± 3.88; Phobic anxiety: 0.68 ± 1.22 / 1.40 ± 2.22; Paranoid ideation: 2.44 ± 2.29 / 3.88 ± 4.24; Psychoticism: 1.64 ± 3.15 / 3.46 ± 3.91 |
| Cash, 1993, <sup>34</sup><br>USA     | Not reported          | Case-control study     | 156 (M/F 60/96), Norwood-Hamilton: II or IIa/III, IIIa, or IIIv/IV to VII 30/20/10 Ludwig: I/II/III 51/40/5 | 34.56 years; no duration record | MBSRQ                             | Hair satisfaction: 2.27 ± 0.88 / 1.85 ± 0.97; Appearance evaluation: 3.80 ± 0.63 / 3.15 ± 0.67                                                                                                                                                                                                                                                                                                               |
|                                      |                       |                        |                                                                                                             |                                 | TSBI                              | Self-esteem: 58.8 ± 9.1 / 54.5 ± 11.6                                                                                                                                                                                                                                                                                                                                                                        |
|                                      |                       |                        |                                                                                                             |                                 | SCS-R                             | Social anxiety: 8.47 ± 4.27 / 10.08 ± 4.64; Public self-consciousness: 15.58 ± 4.44 / 15.56 ± 4.26                                                                                                                                                                                                                                                                                                           |
|                                      |                       |                        |                                                                                                             |                                 | LOC                               | Internality: 38.0 ± 5.0 / 36.1 ± 5.0; Chance: 21.8 ± 6.3 / 22.7 ± 5.8; Powerful others: 23.4 ± 7.0 / 21.8 ± 6.7                                                                                                                                                                                                                                                                                              |
|                                      |                       |                        |                                                                                                             |                                 | IES                               | Stress intrusion: 7.65 ± 4.7 / 10.55 ± 5.75; Stress avoidance: 8.75 ± 5.42 / 10.82 ± 5.14                                                                                                                                                                                                                                                                                                                    |
| Cash, 1992, <sup>35</sup><br>USA     | Not reported          | Case-control study     | 103; Norwood-Hamilton: high-/Low extent of hair loss 40/63                                                  | No mean age and duration record | HLEQ                              | Negative socioemotional events: 59/31; Positive socioemotional events: 8/6; Cognitive preoccupation 69/54; Behavior coping: 69/48<br>(% subjects who increased group mean comparisons)                                                                                                                                                                                                                       |

AC= Avoidant coping; AEC= Active emotional coping; ASEX= Arizona Sexual Experience Scale; BAI= Beck Anxiety Inventory; BDI= Beck Depression Inventory; BFQ= Big Five Inventory; BIPQ= Brief Illness Perception Questionnaire; CES-D= Center for Epidemiologic Studies Depression Scale; COPE= Coping Orientation to Problems Experienced inventory; DDF= Difficulty describing feelings; DIF= Difficulty identifying feelings; DLQI= Dermatology Life Quality Index; EOT= Externally oriented thinking; EQ-i= Emotional Quotient Inventory; F=female; FSFI= Female Sexual Function Index; GHQ-12= 12-Item General Health Questionnaire; HAM-A= Hamilton Anxiety Rating Scale; HLEQ= Hair Loss Effects Questionnaire; HSS-29=Hair-Specific Skindex-29; IES= The 15-item Impact of Event Scale; LOC= Levenson 24-item Locus of Control Scale; M=male; MBSRQ= Multidimensional Body-Self Relations Questionnaire; MCS= Mental component summary; mWAA-QOL= Modified Women's Androgenetic Alopecia-Quality of Life ; PCS= Physical component summary; PFC= Problem-focused coping; RAND-36= RAND 36-Item Health Survey; RSES= Rosenberg Self-Esteem Scale; SAS= Self-rating Anxiety Scale; SCL-90-R= Symptom Checklist-90-Revised; SCS-R= Self-consciousness scale; SDS= Self-rating Depression Scale ; SF-12=12-item Short-Form Health Survey; SIAS= Social interaction anxiety scale; SLES= Stressful Life Event Scale; SPI= Social Phobia Inventory; SPS= Self-perception scale; STAI= State-Trait Anxiety Inventory; TAS-20= Toronto Alexithymia Scale; TEI-Que-SF= Trait Emotional Intelligence Questionnaire-Short Form; TQL= Dermatology Quality of Life instrument in Turkish; TSBI= Texas Social Behavior Inventory; VAS= Visual Analogue Scale; WAA-QOL= Women's Androgenetic Alopecia-Quality of Life; WHO/QOL-26= WHO Quality of Life-BREF.



**eTable 3.** Factors Associated With Health-Related Quality of Life in Androgenetic Alopecia

| Factor associated with HRQOL                                                   | Number of studies | n     | Inverse | No | Direct |
|--------------------------------------------------------------------------------|-------------------|-------|---------|----|--------|
| <b>Social-demographic</b>                                                      |                   |       |         |    |        |
| Female gender <sup>23-25,29,30,34,39,42</sup>                                  | 8                 | 1,847 | 5       | 3  | 0      |
| Younger age <sup>20-22,24,26,35,36,40,42,55</sup>                              | 10                | 2,425 | 4       | 5  | 1      |
| Married or Couple <sup>21,23,35,36,42</sup>                                    | 5                 | 813   | 0       | 0  | 5      |
| Higher level of education <sup>17,23,42</sup>                                  | 3                 | 800   | 3       | 0  | 0      |
| <b>Clinical</b>                                                                |                   |       |         |    |        |
| Younger age of onset <sup>20,21,23,35,37,39</sup>                              | 6                 | 1,217 | 4       | 2  | 0      |
| Longer disease duration <sup>20,22,24,36,39,40,42,55</sup>                     | 8                 | 2,422 | 3       | 4  | 1      |
| Higher disease severity <sup>20-22,24,25,30,33,36,37,39-42,46,53,55</sup>      | 16                | 4,432 | 9*      | 5  | 3*     |
| Higher patient-rated hair loss severity or Lower VAS score <sup>21,22,33</sup> | 3                 | 331   | 3       | 0  | 0      |
| Family history of AGA <sup>21,23,55</sup>                                      | 3                 | 885   | 1       | 2  | 0      |
| Combined with metabolic syndrome <sup>26</sup>                                 | 1                 | 115   | 1       | 0  | 0      |
| <b>Treatment-related</b>                                                       |                   |       |         |    |        |
| Wearing head scarves <sup>24</sup>                                             | 1                 | 82    | 0       | 1  | 0      |
| Hair transplant <sup>16</sup>                                                  | 1                 | 875   | 0       | 0  | 1      |
| Receive topical or oral medical treatment <sup>22,43-46,51,55</sup>            | 7                 | 1,667 | 0       | 0  | 7      |
| Higher hospital visits for AGA treatment <sup>40</sup>                         | 1                 | 998   | 1       | 0  | 0      |
| History of non-medical hair care <sup>40</sup>                                 | 1                 | 998   | 1       | 0  | 0      |
| Good response to medicine <sup>22,51</sup>                                     | 2                 | 152   | 0       | 2  | 0      |
| <b>Psychological</b>                                                           |                   |       |         |    |        |
| Maladaptive patient <sup>53</sup>                                              | 1                 | 20    | 1       | 0  | 0      |
| Regard their MPB as minimally noticeable <sup>35</sup>                         | 1                 | 103   | 0       | 0  | 1      |

\* In the study of Tas et al. (2018), higher disease severity has negative impact on women's HRQOL but positive impact on men's HRQOL.

**eFigure 1.** Dermatology Life Quality Index Score in Androgenetic Alopecia Patients of Different Sexes

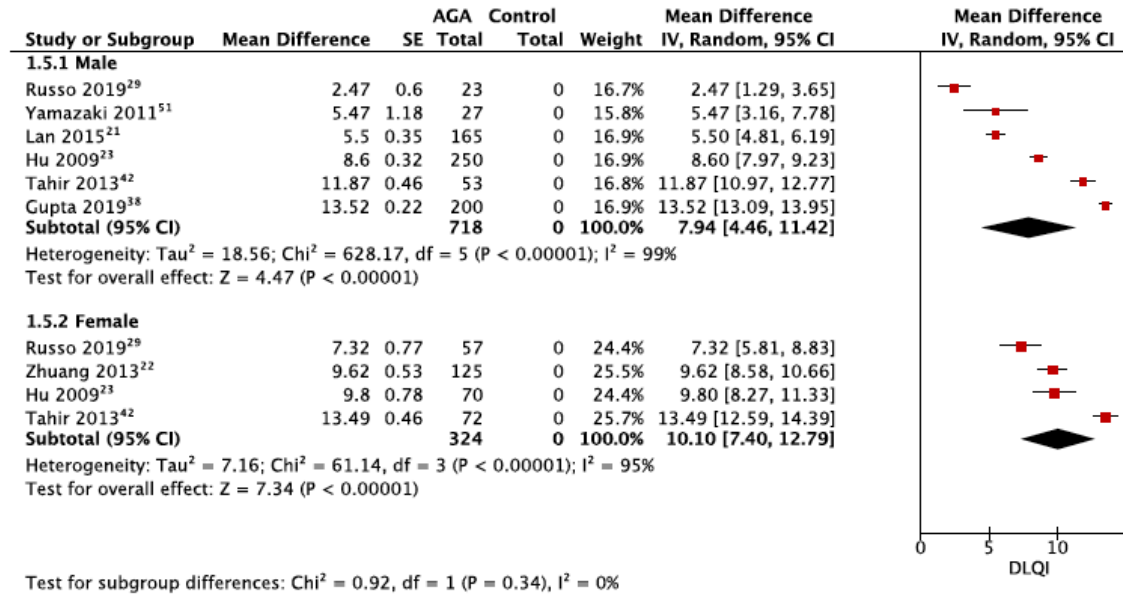

**eFigure 2.** Dermatology Life Quality Index Score in Androgenetic Alopecia Patients in Asia and Europe

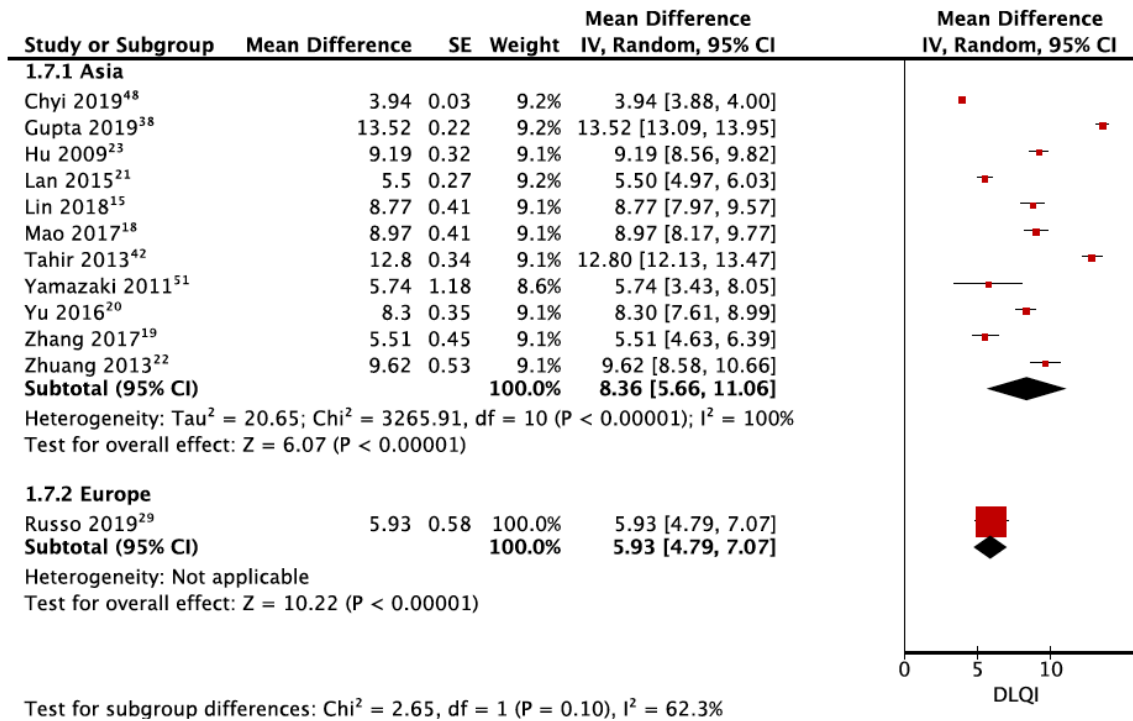

Supplement: jamadermatol-e212196-s001.pdf [file jamadermatol-e212196-s001.pdf]
